# Supplementary material for: Mobile App Delivery of the EORTC QLQ-C30 Questionnaire to Assess Health-Related Quality of Life in Oncological Patients: Usability Study
Source: PubMed Central journal article supplement (PMC5840479; doi:10.2196/mhealth.9486), 2018-02-20
Supplement: mhealth_v6i2e45_app1.pdf [file mhealth_v6i2e45_app1.pdf]

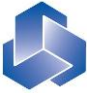

## EORTC QLQ-C30 (Version 3)

Wir sind an einigen Angaben interessiert, die Sie und Ihre Gesundheit betreffen. Bitte beantworten Sie die folgenden Fragen selbst, indem Sie die Zahl einkreisen, die am besten auf Sie zutrifft. Es gibt keine „richtigen“ oder „falschen“ Antworten. Ihre Angaben werden streng vertraulich behandelt.

Bitte tragen Sie Ihre Initialen ein:

|  |  |  |  |  |
|--|--|--|--|--|
|  |  |  |  |  |
|--|--|--|--|--|

Ihr Geburtsdatum (Tag, Monat, Jahr):

|  |  |  |  |  |  |  |  |  |  |
|--|--|--|--|--|--|--|--|--|--|
|  |  |  |  |  |  |  |  |  |  |
|--|--|--|--|--|--|--|--|--|--|

Das heutige Datum (Tag, Monat, Jahr):

31 

|  |  |  |  |  |  |  |  |  |  |
|--|--|--|--|--|--|--|--|--|--|
|  |  |  |  |  |  |  |  |  |  |
|--|--|--|--|--|--|--|--|--|--|

|                                                                                                                                     | <b>Überhaupt</b> |              |              |             |
|-------------------------------------------------------------------------------------------------------------------------------------|------------------|--------------|--------------|-------------|
|                                                                                                                                     | <b>nicht</b>     | <b>Wenig</b> | <b>Mäßig</b> | <b>Sehr</b> |
| 1. Bereitet es Ihnen Schwierigkeiten, sich körperlich anzustrengen (z. B. eine schwere Einkaufstasche oder einen Koffer zu tragen)? | 1                | 2            | 3            | 4           |
| 2. Bereitet es Ihnen Schwierigkeiten, einen <u>längeren</u> Spaziergang zu machen?                                                  | 1                | 2            | 3            | 4           |
| 3. Bereitet es Ihnen Schwierigkeiten, eine <u>kurze</u> Strecke außer Haus zu gehen?                                                | 1                | 2            | 3            | 4           |
| 4. Müssen Sie tagsüber im Bett liegen oder in einem Sessel sitzen?                                                                  | 1                | 2            | 3            | 4           |
| 5. Brauchen Sie Hilfe beim Essen, Anziehen, Waschen oder Benutzen der Toilette?                                                     | 1                | 2            | 3            | 4           |

### Während der letzten Woche:

|                                                                                            | <b>Überhaupt</b> |              |              |             |
|--------------------------------------------------------------------------------------------|------------------|--------------|--------------|-------------|
|                                                                                            | <b>nicht</b>     | <b>Wenig</b> | <b>Mäßig</b> | <b>Sehr</b> |
| 6. Waren Sie bei Ihrer Arbeit oder bei anderen tagtäglichen Beschäftigungen eingeschränkt? | 1                | 2            | 3            | 4           |
| 7. Waren Sie bei Ihren Hobbys oder anderen Freizeitbeschäftigungen eingeschränkt?          | 1                | 2            | 3            | 4           |
| 8. Waren Sie kurzatmig?                                                                    | 1                | 2            | 3            | 4           |
| 9. Hatten Sie Schmerzen?                                                                   | 1                | 2            | 3            | 4           |
| 10. Mussten Sie sich ausruhen?                                                             | 1                | 2            | 3            | 4           |
| 11. Hatten Sie Schlafstörungen?                                                            | 1                | 2            | 3            | 4           |
| 12. Fühlten Sie sich schwach?                                                              | 1                | 2            | 3            | 4           |
| 13. Hatten Sie Appetitmangel?                                                              | 1                | 2            | 3            | 4           |
| 14. War Ihnen übel?                                                                        | 1                | 2            | 3            | 4           |
| 15. Haben Sie erbrochen?                                                                   | 1                | 2            | 3            | 4           |
| 16. Hatten Sie Verstopfung?                                                                | 1                | 2            | 3            | 4           |

Bitte wenden
