# Supplementary material for: Mobile App Delivery of the EORTC QLQ-C30 Questionnaire to Assess Health-Related Quality of Life in Oncological Patients: Usability Study
Source: JMIR Mhealth Uhealth. 2018 Feb 20;6(2):e45. doi: 10.2196/mhealth.9486 (PMC5840479; doi:10.2196/mhealth.9486)
Supplement: Multimedia Appendix 3 [file mhealth_v6i2e45_app3.pdf]

**8. Wie fanden Sie das Design der App in Bezug auf...****... die Größe der Buttons (Schaltfläche)?**

|               |   |   |   |   |                     |
|---------------|---|---|---|---|---------------------|
| 1             | 2 | 3 | 4 | 5 | 6                   |
| Finde ich gut |   |   |   |   | Finde ich nicht gut |

**... den Inhalt der Texte?**

|               |   |   |   |   |                     |
|---------------|---|---|---|---|---------------------|
| 1             | 2 | 3 | 4 | 5 | 6                   |
| Finde ich gut |   |   |   |   | Finde ich nicht gut |

**... die Farben?**

|               |   |   |   |   |                     |
|---------------|---|---|---|---|---------------------|
| 1             | 2 | 3 | 4 | 5 | 6                   |
| Finde ich gut |   |   |   |   | Finde ich nicht gut |

**... die Schriftgröße?**

|               |   |   |   |   |                     |
|---------------|---|---|---|---|---------------------|
| 1             | 2 | 3 | 4 | 5 | 6                   |
| Finde ich gut |   |   |   |   | Finde ich nicht gut |

**... Inhalt pro Seite?**

|               |   |   |   |   |                     |
|---------------|---|---|---|---|---------------------|
| 1             | 2 | 3 | 4 | 5 | 6                   |
| Finde ich gut |   |   |   |   | Finde ich nicht gut |

**9. Haben Sie Vorschläge, Ideen oder Kritikpunkte bezüglich der App?**

---

---

**10. Was hat Ihnen am besten gefallen? Was hat Sie am meisten gestört?**

---

---

---

**11. Haben Sie Informationen oder Funktionen vermisst?**

---

---

\*\*\* Vielen Dank für die Teilnahme \*\*\*
